# Supplementary material for: Disentangling complex parasite interactions: Protection against cerebral malaria by one helminth species is jeopardized by co-infection with another
Source: PubMed Central journal article supplement (PMC5963812; doi:10.1371/journal.pntd.0006483), 2018-05-10
Supplement: pntd.0006483.s001.pdf [file pntd.0006483.s001.pdf]

**Disentangling complex parasite interactions: protection against cerebral malaria by one helminth species is jeopardized by co-infection with another**

Jessica L. Abbate, Vanessa O. Ezenwa, Jean-François Guégan, Marc Choisy, Mathieu Nacher, Benjamin Roche

**Table S1: Helminth species infection status and cerebral malaria occurrence counts for all hyperparasitemic *P. falciparum* cases**

| Infection and Co-infection Frequencies of Hyperparasitemic <i>P. falciparum</i> patients with and without cerebral malaria (CM) |                          |           |    |           |                       |         |            |
|---------------------------------------------------------------------------------------------------------------------------------|--------------------------|-----------|----|-----------|-----------------------|---------|------------|
| Coinfection Status                                                                                                              | Pathogen species present |           |    |           | Number of Occurrences | With CM | Without CM |
| 4 species                                                                                                                       | <i>Al</i>                | <i>Tt</i> | HW | <i>Ss</i> | 4                     | 1       | 3          |
| 3 species                                                                                                                       | <i>Al</i>                | <i>Tt</i> | HW |           | 17                    | 1       | 16         |
|                                                                                                                                 | <i>Al</i>                | <i>Tt</i> |    | <i>Ss</i> | 1                     | 0       | 1          |
|                                                                                                                                 | <i>Al</i>                |           | HW | <i>Ss</i> | 2                     | 0       | 2          |
|                                                                                                                                 |                          | <i>Tt</i> | HW | <i>Ss</i> | 3                     | 1       | 2          |
| 2 species                                                                                                                       | <i>Al</i>                | <i>Tt</i> |    |           | 11                    | 0       | 11         |
|                                                                                                                                 | <i>Al</i>                |           | HW |           | 9                     | 0       | 9          |
|                                                                                                                                 | <i>Al</i>                |           |    | <i>Ss</i> | 1                     | 0       | 1          |
|                                                                                                                                 |                          | <i>Tt</i> | HW |           | 14                    | 3       | 11         |
|                                                                                                                                 |                          | <i>Tt</i> |    | <i>Ss</i> | 1                     | 0       | 1          |
|                                                                                                                                 |                          |           | HW | <i>Ss</i> | 6                     | 1       | 5          |
| Single infections                                                                                                               | <i>Al</i>                |           |    |           | 9                     | 1       | 8          |
|                                                                                                                                 |                          | <i>Tt</i> |    |           | 19                    | 1       | 18         |
|                                                                                                                                 |                          |           | HW |           | 30                    | 8       | 22         |
|                                                                                                                                 |                          |           |    | <i>Ss</i> | 12                    | 3       | 9          |
| Not infected                                                                                                                    |                          |           |    | 144       | 47                    | 97      |            |
| Sum                                                                                                                             |                          |           |    | 283       | 67                    | 216     |            |

**Table S1.** Helminth species infection status and cerebral malaria occurrence counts for all hyperparasitemic *P. falciparum* cases. Helminth species included *Ascaris lumbricoides* (*Al*), *Trichuris trichiura* (*Tt*), hookworm (HW), and *Strongyloides stercoralis* (*Ss*).
